# Supplementary material for: Ion conduction and phase morphology in sulfonate copolymer ionomers based on ionic liquid–sodium cation mixtures
Source: Royal Society of Chemistry journal article supplement (doi:10.1039/c3ta13835f), 2013-11-11
Supplement: c3ta13835f.pdf [file c3ta13835f.pdf]

## Supporting Information

### Ion Conduction and phase morphology in sulfonate copolymer ionomers based on ionic liquid - sodium cation mixtures.

Siti Aminah Mohd Noor,<sup>a,b</sup> Daniel Gunzelmann,<sup>d</sup> Jiazeng Sun,<sup>a</sup> Douglas R MacFarlane<sup>a,c</sup> and Maria Forsyth,<sup>c,d\*</sup>

<sup>a</sup> School of Chemistry, Monash University, Clayton Campus, Victoria, Australia

<sup>b</sup> Chemistry Department, Centre for Defence Foundation Studies, National Defence University of Malaysia, 57000, Kuala Lumpur, Malaysia

<sup>c</sup> ARC Centre of Excellence for Electromaterials Science (ACES)

<sup>d</sup> Institute for Frontier Materials Deakin University, Victoria, Australia

\* [maria.forsyth@deakin.edu.au](mailto:maria.forsyth@deakin.edu.au)

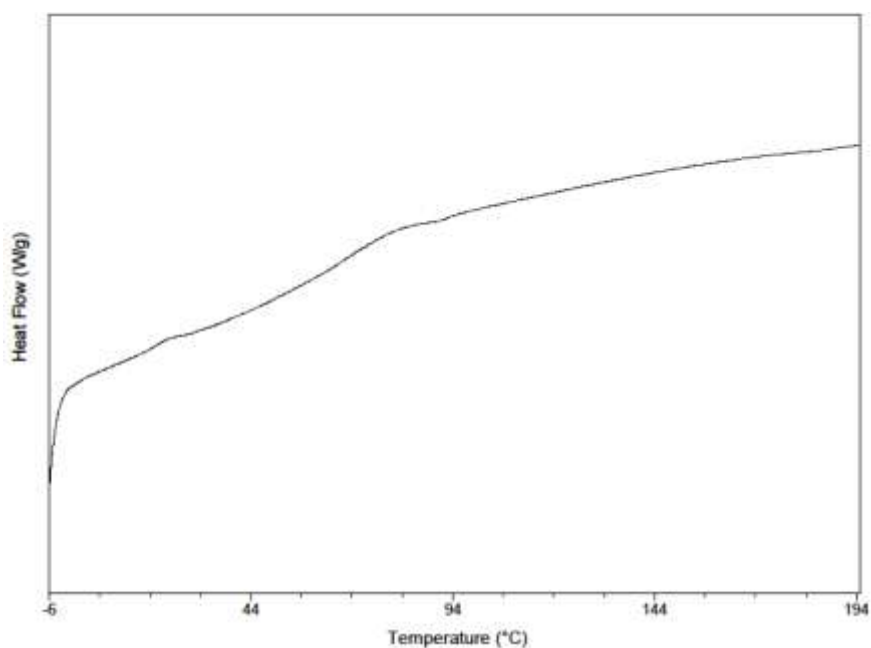

**Fig. S1** DSC thermogram of poly ([N<sub>1222</sub>][AMPS]-co-Na[VS]) (90:10) ionomer with 10% PEG

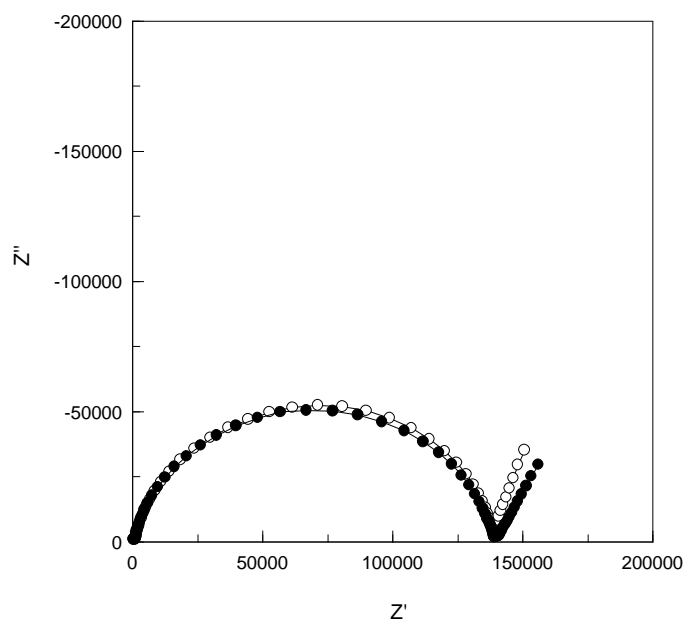

**Fig. S2** Impedance plane plot of poly ([N<sub>1222</sub>][AMPS]-co-Na[VS]) (90:10) ionomer with 10% PEG

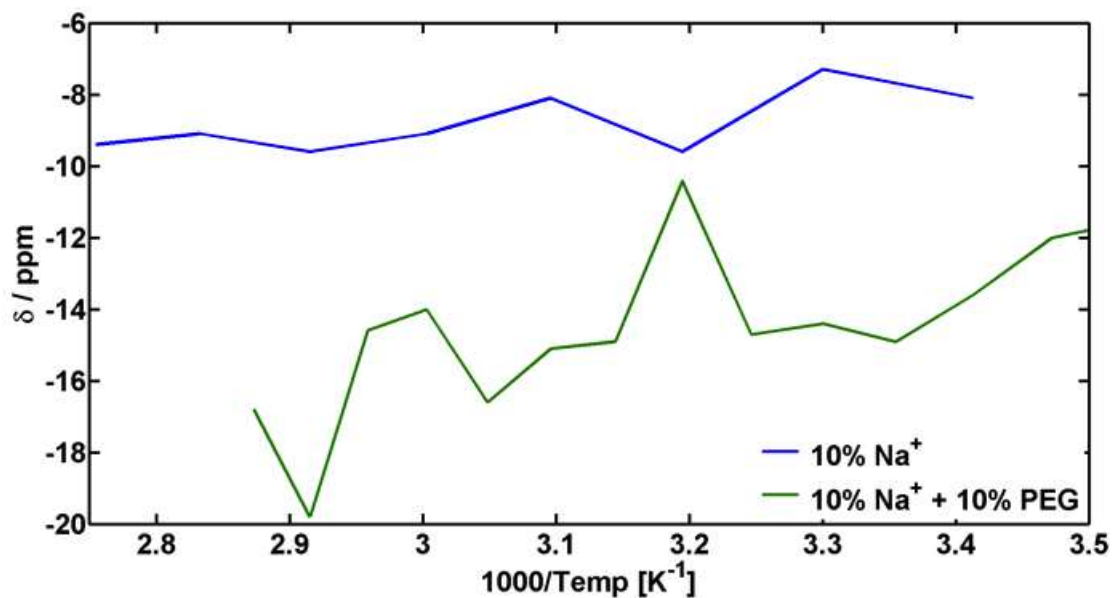

**Fig. S3** Comparison of the position of the intensity maximum for 10% Na<sup>+</sup> and 10% PEG addition

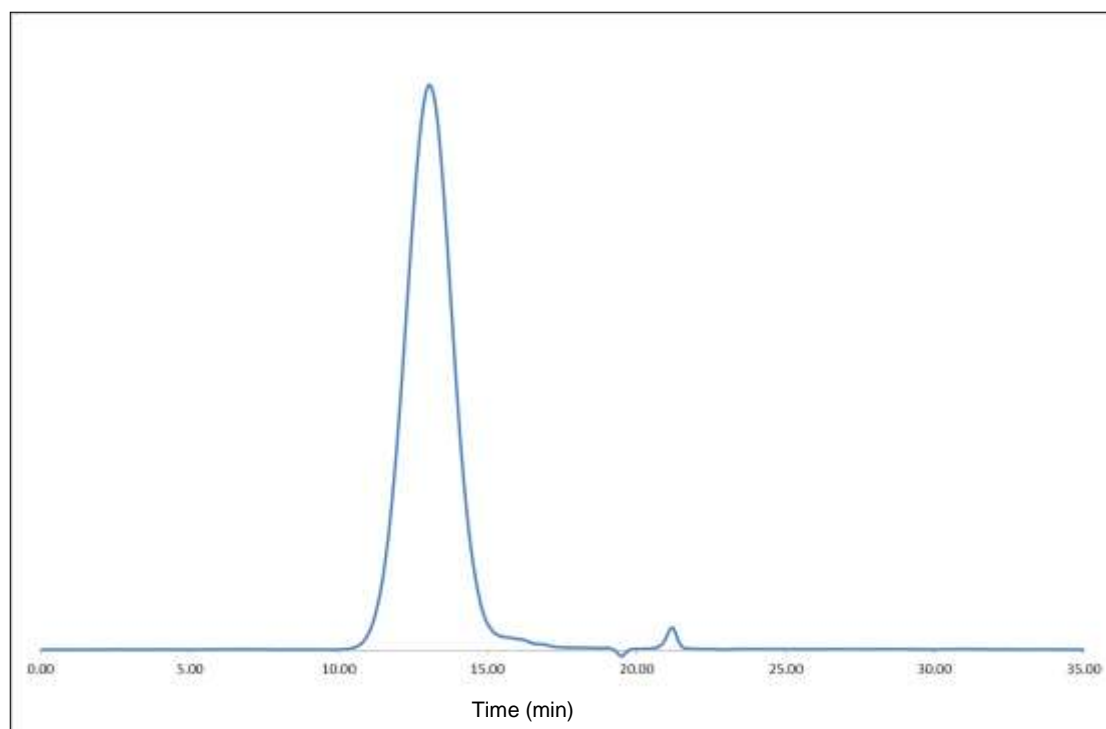

**Fig. S4** Gel Permeation Chromatography of poly ( $[\text{N}_{1222}][\text{AMPS}]\text{-co-Na}[\text{VS}]$ ) (50:50). Note that the small peak is solvent peak.

**Table S1** Molecular weight and polydispersity index of poly ( $[\text{N}_{1222}][\text{AMPS}]\text{-co-Na}[\text{VS}]$ ) with various composition of  $\text{Na}^+$

| Sample (% $\text{Na}^+$ ) | Mn (g/mol) | PDI   |
|---------------------------|------------|-------|
| 50                        | 19905      | 2.599 |
| 20                        | 24928      | 2.559 |
| 10                        | 24750      | 2.589 |
